# Supplementary material for: Near-infrared light-triggered drug release nanogels for combined photothermal-chemotherapy of cancer
Source: Royal Society of Chemistry journal article supplement (doi:10.1039/c5bm00048c), 2015-01-01
Supplement: c5bm00048c1.pdf [file c5bm00048c1.pdf]

## Supporting Information

### **Near-infrared light-triggered drug release nanogels for combined photothermal-chemotherapy of cancer**

*Minghui Zan,<sup>a,b</sup> Junjie Li,<sup>b</sup> Mingming Huang,<sup>b</sup> Shanqing Lin,<sup>b</sup> Dan Luo,<sup>\*c</sup> Shizhong*

*Luo<sup>\*a</sup> and Zhishen Ge<sup>\*b</sup>*

*<sup>a</sup> Key Laboratory of Functional Molecular Solids, Ministry of Education, Anhui Key Laboratory of Molecule-based Materials, College of Chemistry and Materials Science, Anhui Normal University, Wuhu, Anhui, China. E-mail: [shzhluo@mail.ahnu.edu.cn](mailto:shzhluo@mail.ahnu.edu.cn)*

*<sup>b</sup> CAS Key Laboratory of Soft Matter Chemistry, Department of Polymer Science and Engineering, University of Science and Technology of China, Hefei, Anhui 230026, China. E-mail: [gezs@ustc.edu.cn](mailto:gezs@ustc.edu.cn)*

*<sup>c</sup> Department of Ophthalmology, Hospital of Anhui Province, Hefei, Anhui 230001, China. Email: [luodanld@hotmail.com](mailto:luodanld@hotmail.com).*

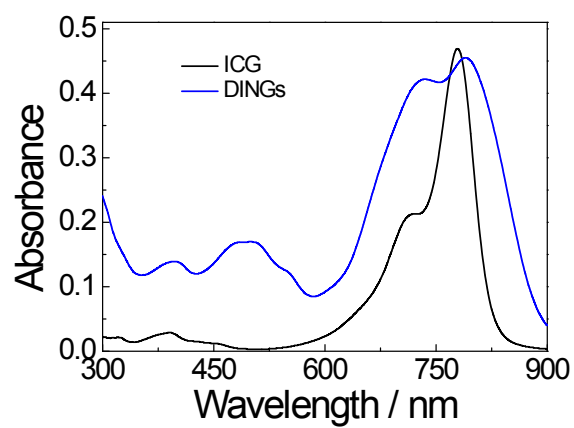

**Fig. S1.** Absorbance spectra of free ICG and DINGs in aqueous solution;

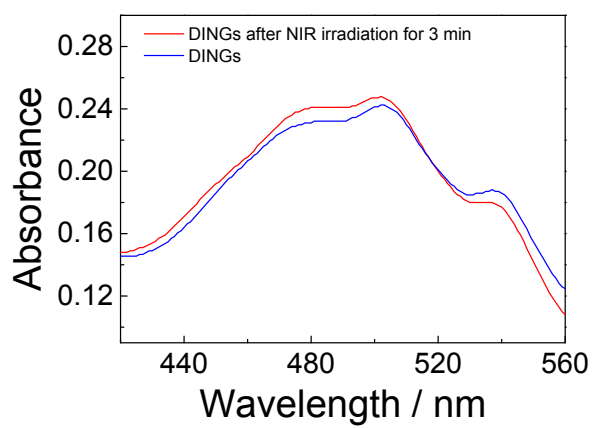

**Fig. S2.** Absorbance spectra of DOX in DINGs before and after 3 min NIR irradiation which were measure by dissolving in DMSO.

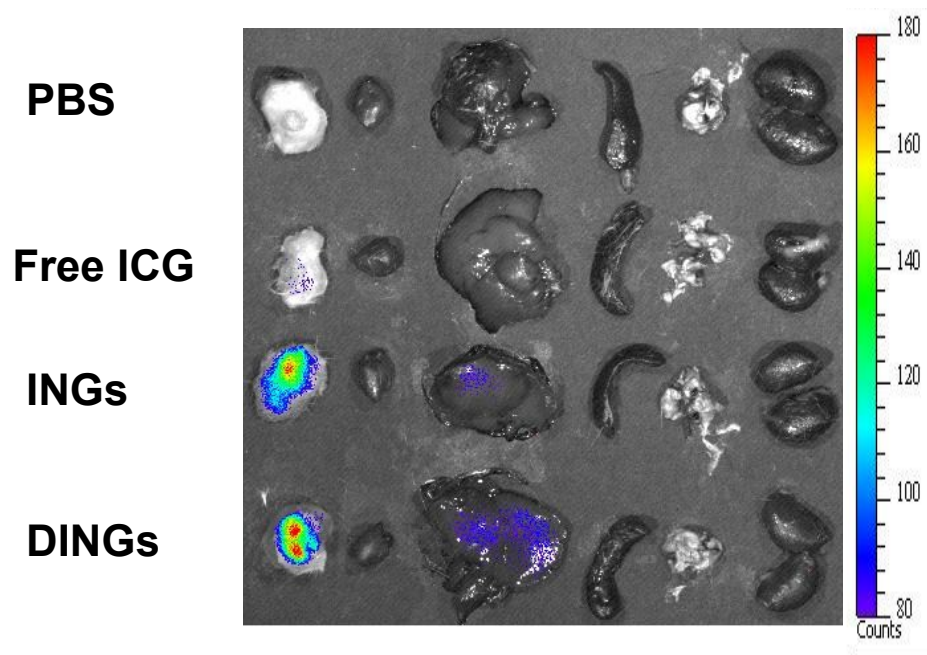

**Fig S3.** *Ex vivo* fluorescence images of main organs of mice bearing H22 tumor at 24 h post-injection of free ICG, INGs, and DINGs.

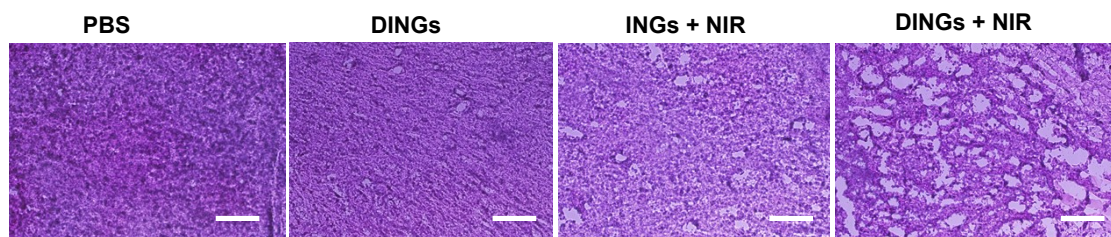

**Fig. S4.** H&E staining of tumor sections after treatment with PBS, DINGs, INGs + NIR, and DINGs + NIR, respectively. Scale bars represent 100  $\mu\text{m}$ .
